# Supplementary material for: A Screen of Coxiella burnetii Mutants Reveals Important Roles for Dot/Icm Effectors and Host Autophagy in Vacuole Biogenesis
Source: PubMed Central journal article supplement (PMC4117601; doi:10.1371/journal.ppat.1004286), 2014-07-31

*C. burnetii* NMII

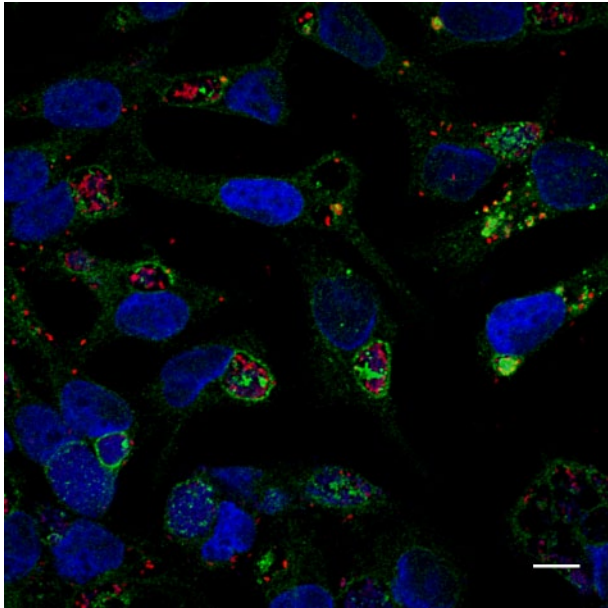

*cig57::Tn*

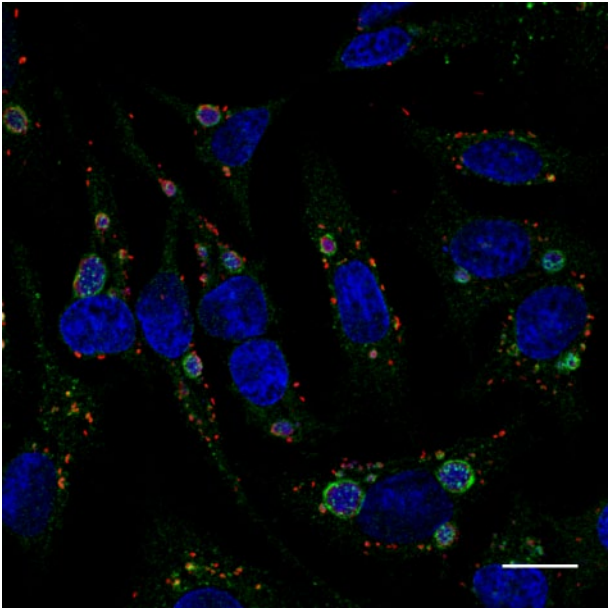

*cig2::Tn*

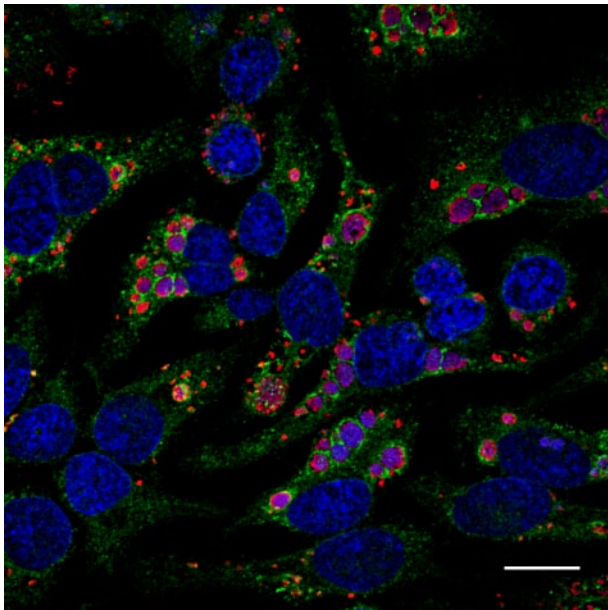

Supplement: ppat.1004286.s001.pdf [file ppat.1004286.s001.pdf]
