# Supplementary material for: A Screen of Coxiella burnetii Mutants Reveals Important Roles for Dot/Icm Effectors and Host Autophagy in Vacuole Biogenesis
Source: PubMed Central journal article supplement (PMC4117601; doi:10.1371/journal.ppat.1004286), 2014-07-31

**A**

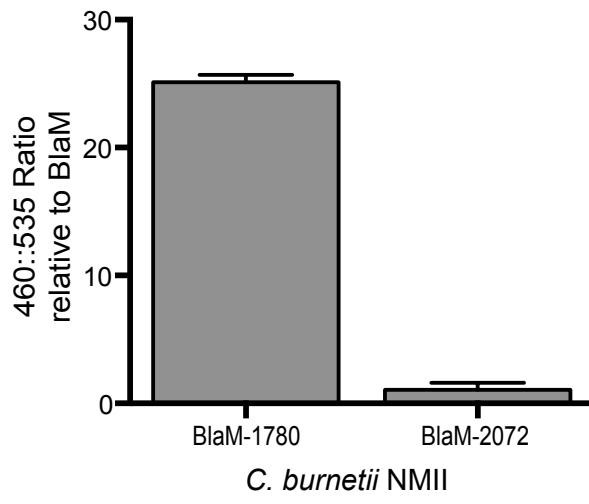

**B**

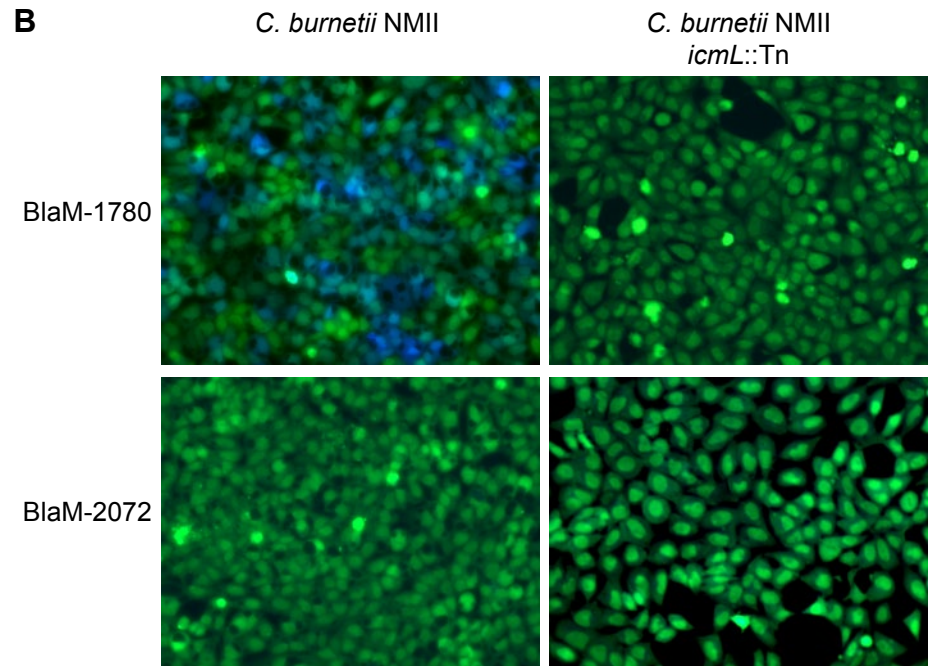

Supplement: ppat.1004286.s002.pdf [file ppat.1004286.s002.pdf]
